# Supplementary material
Source: PubMed Central journal article supplement (PMC3962480)
Supplement: supp_g3.113.009365_FigureS1.pdf [file supp_g3.113.009365_FigureS1.pdf]

Supplementary Figure 1A: aCGH of Pop2 210 clone1

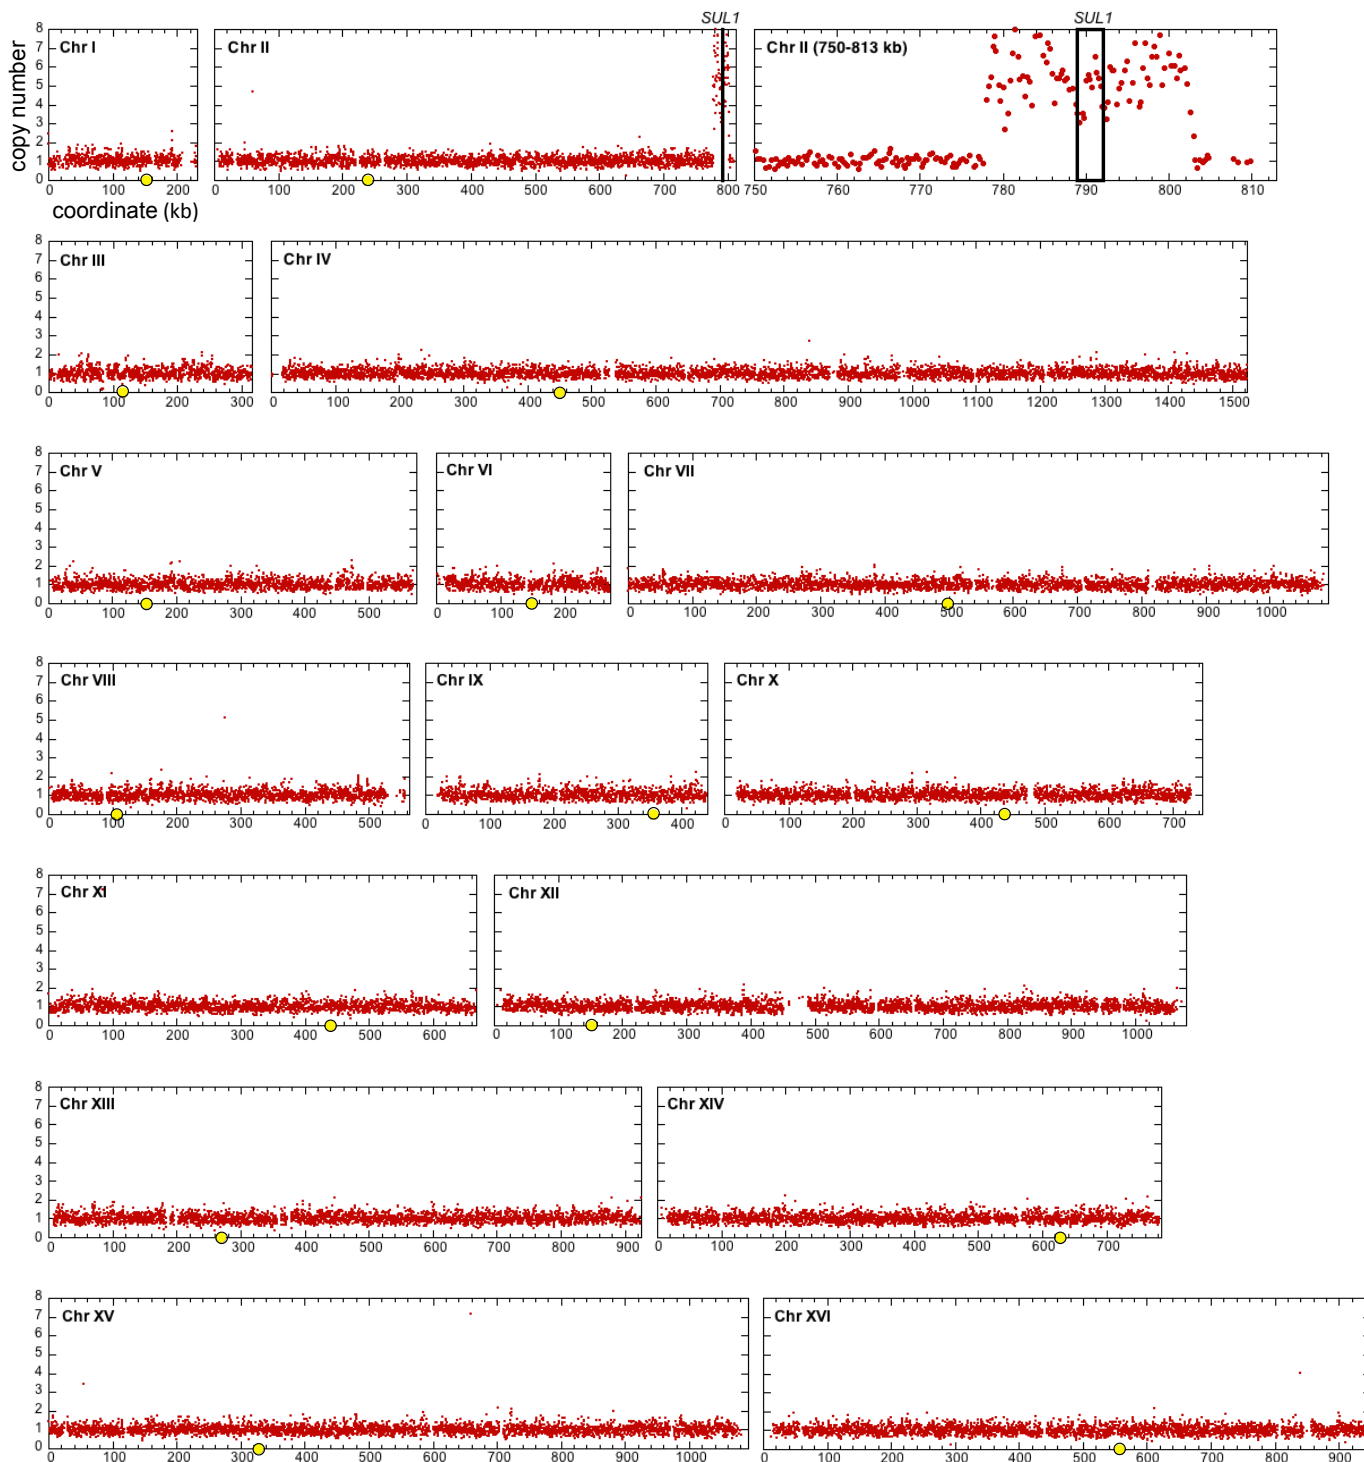

Supplementary Figure 1B: aCGH of Pop3 210 clone1

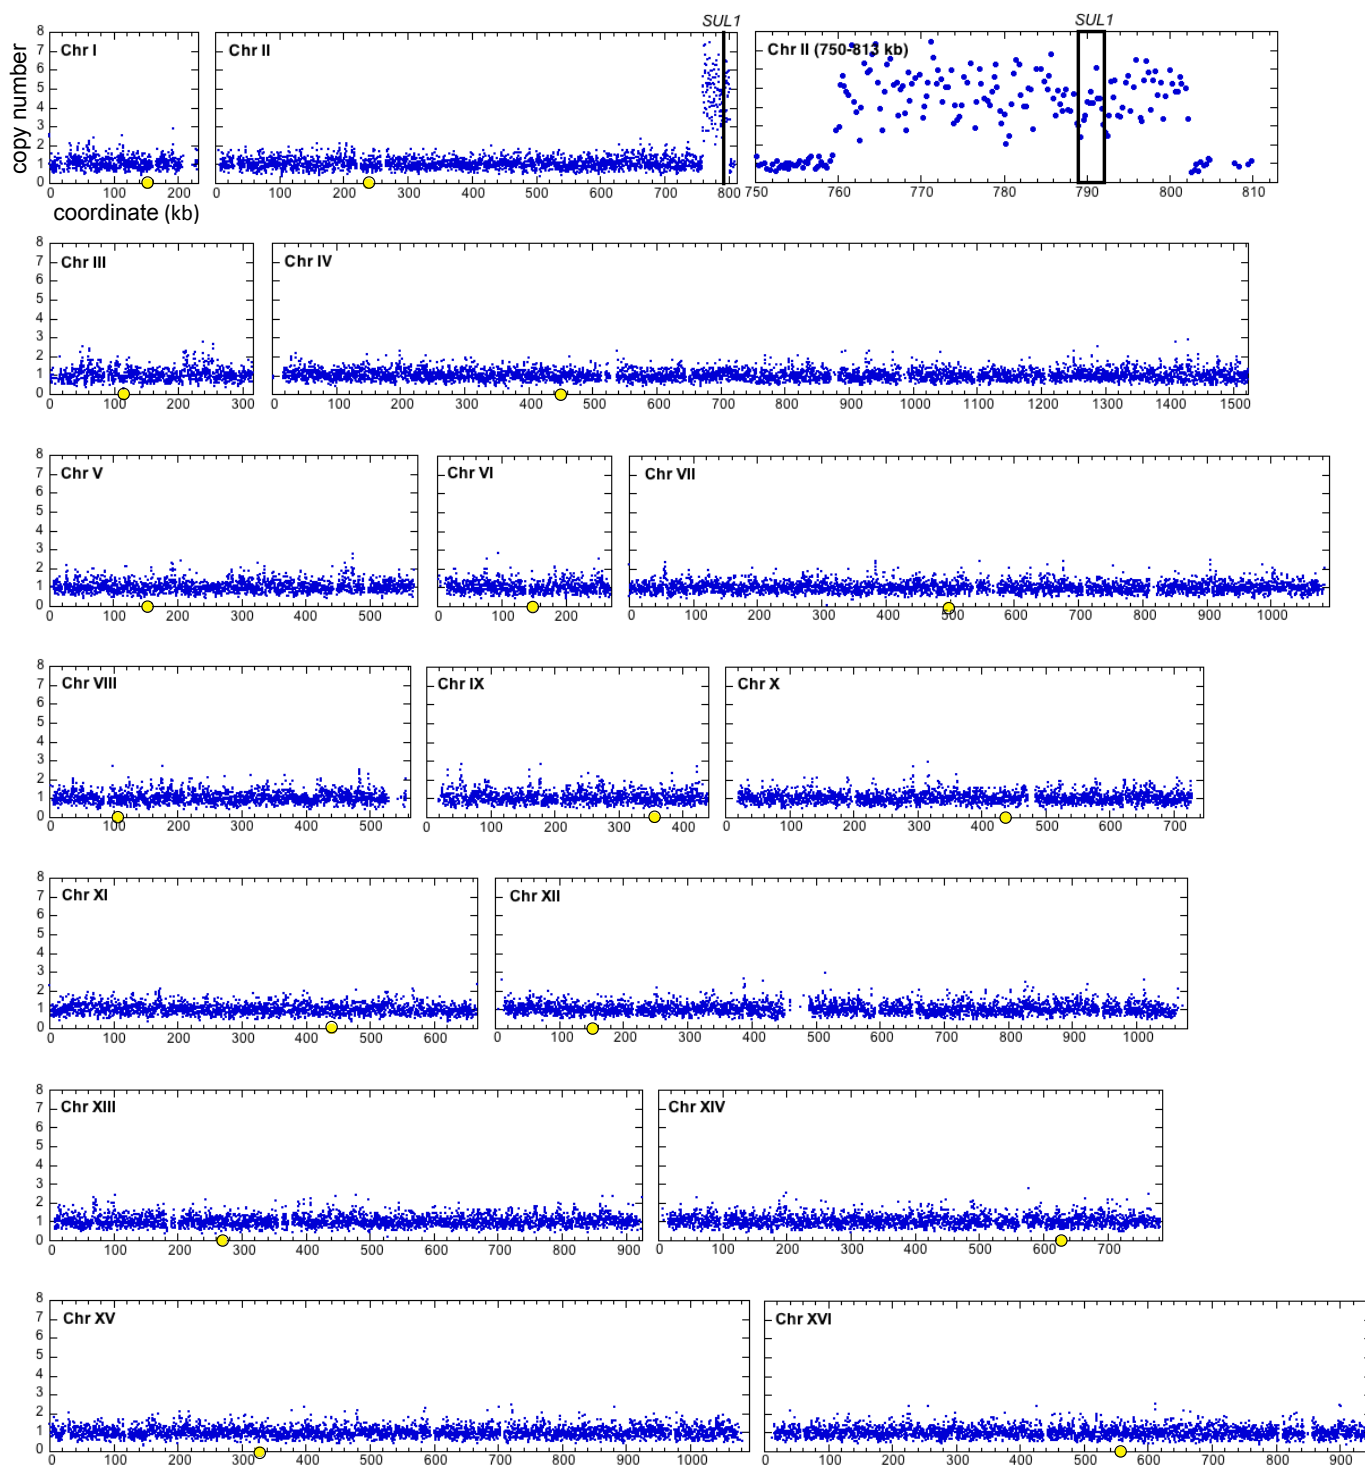

# Supplementary Figure 1C: aCGH of Pop4 210 clone1

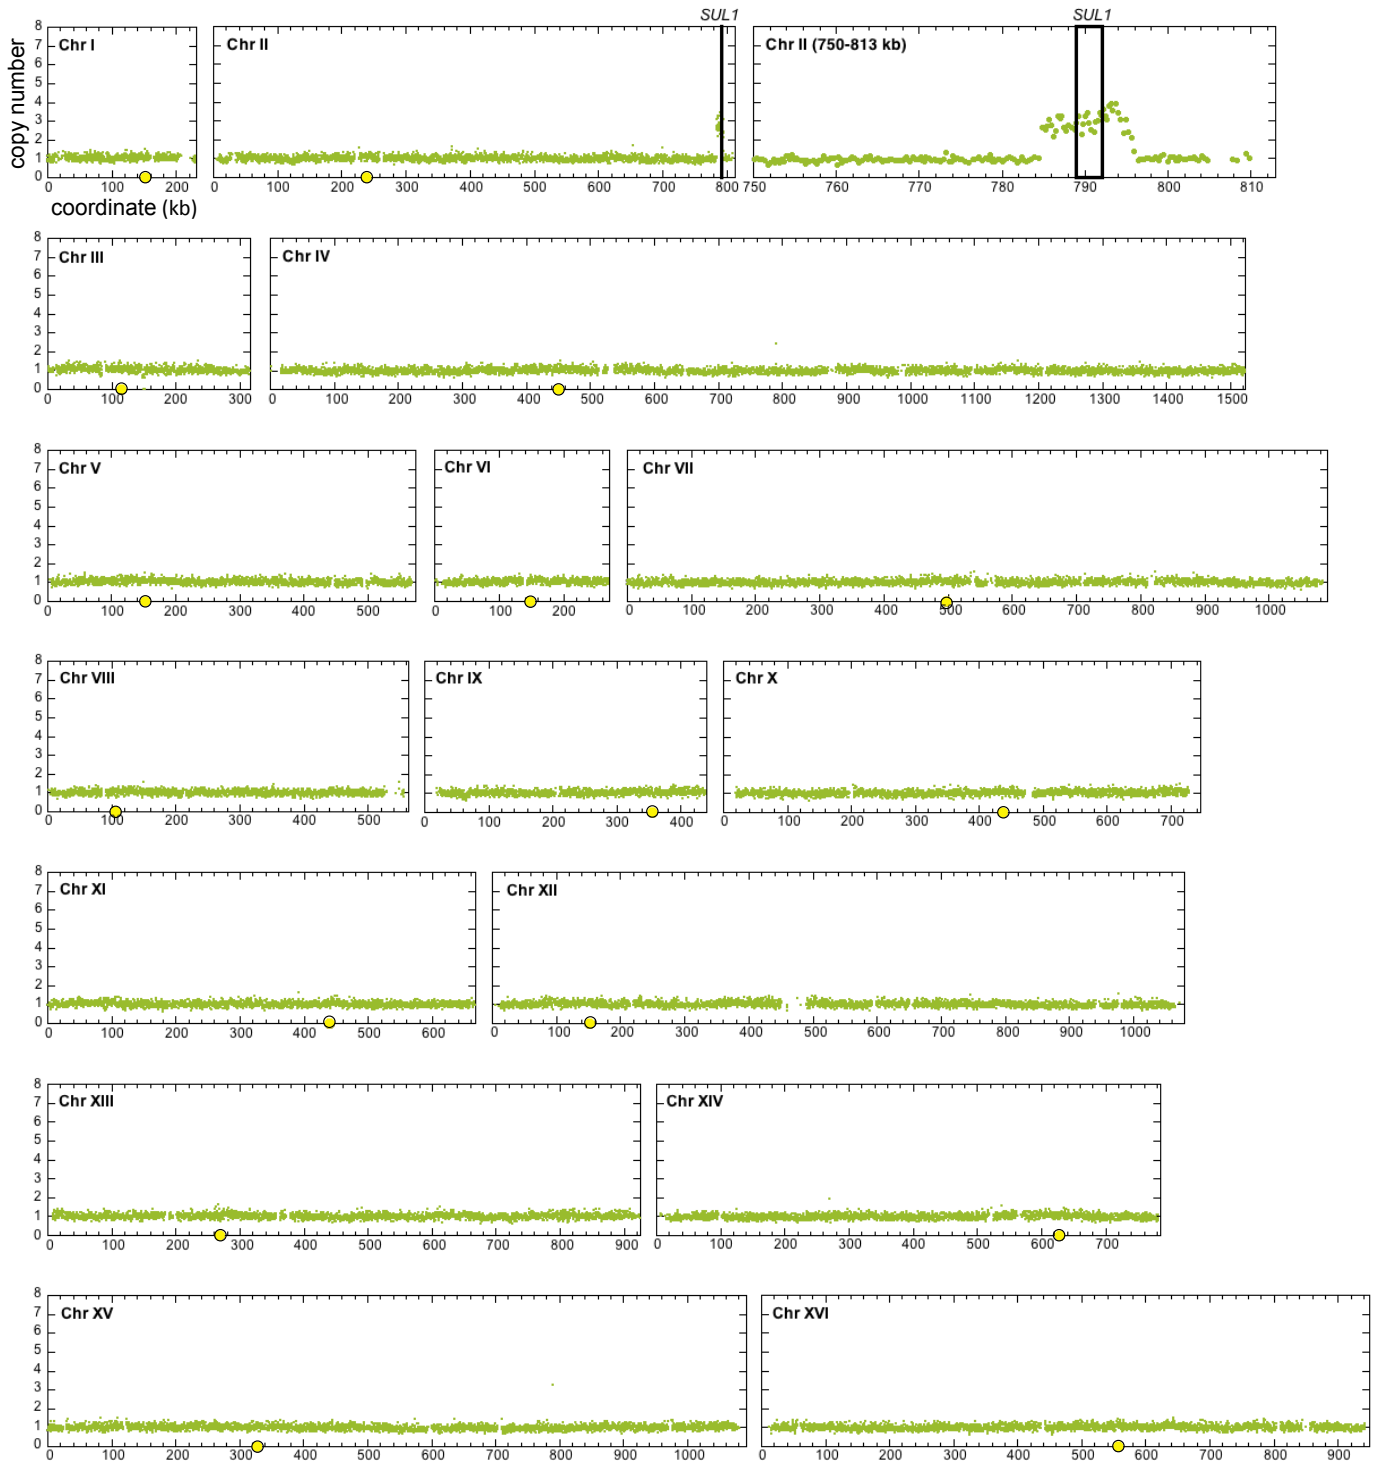

Supplementary Figure 1D: aCGH of Pop5 209 clone1

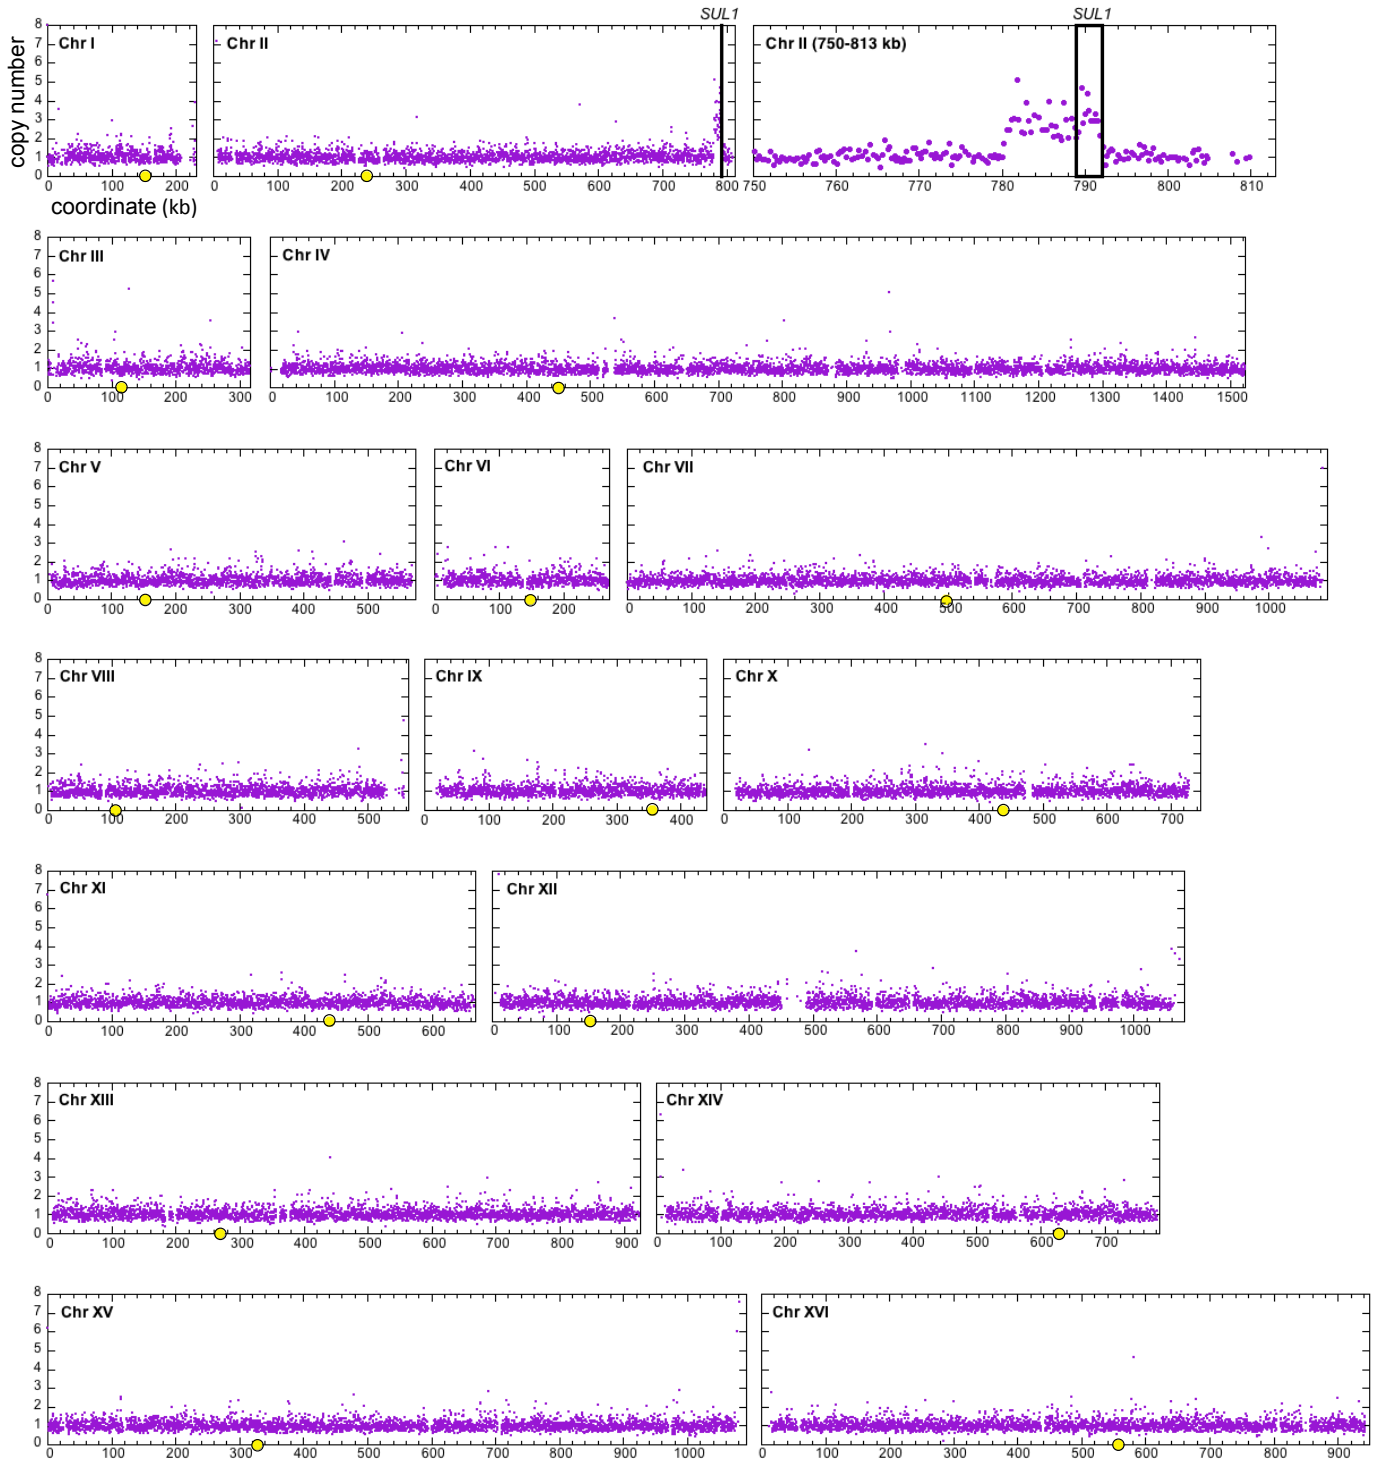

### Supplementary Figure 1E: aCGH of Pop6 211 clone1

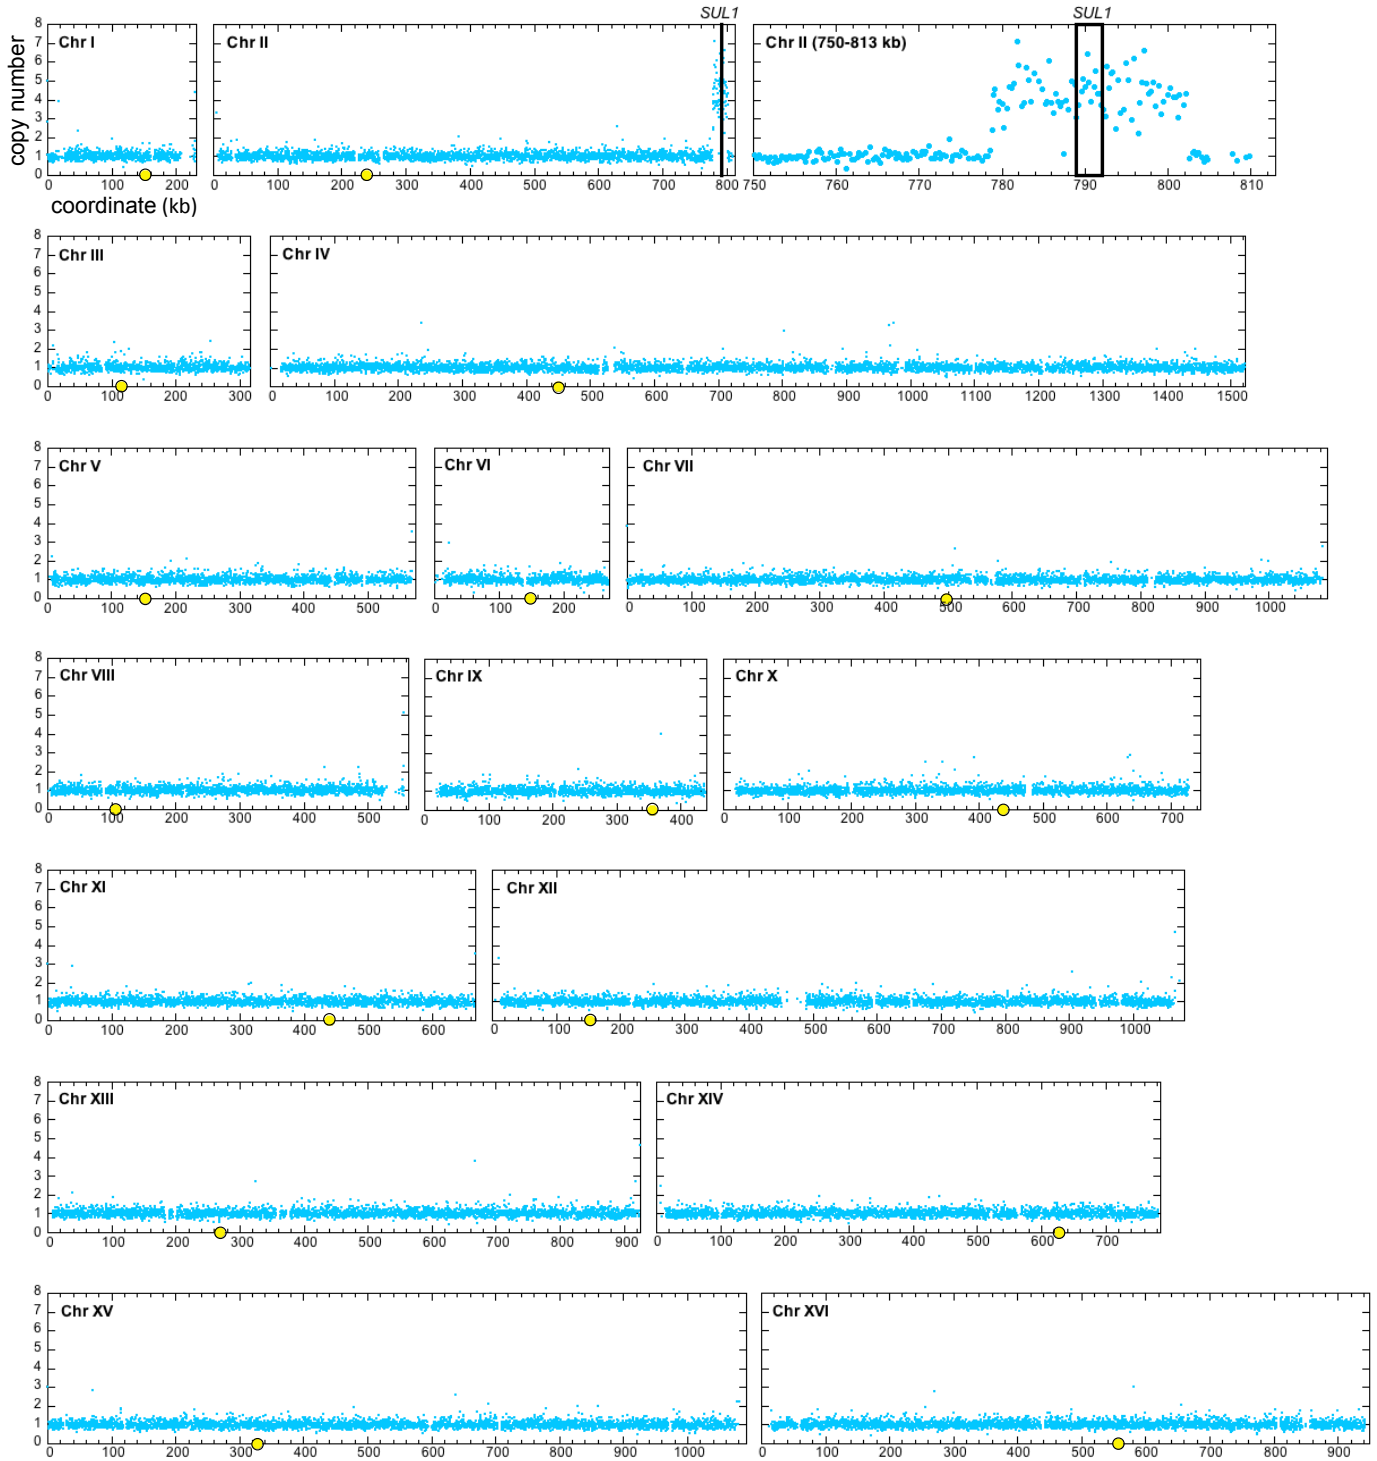

# Supplementary Figure 1F: aCGH of Pop7 201 clone1

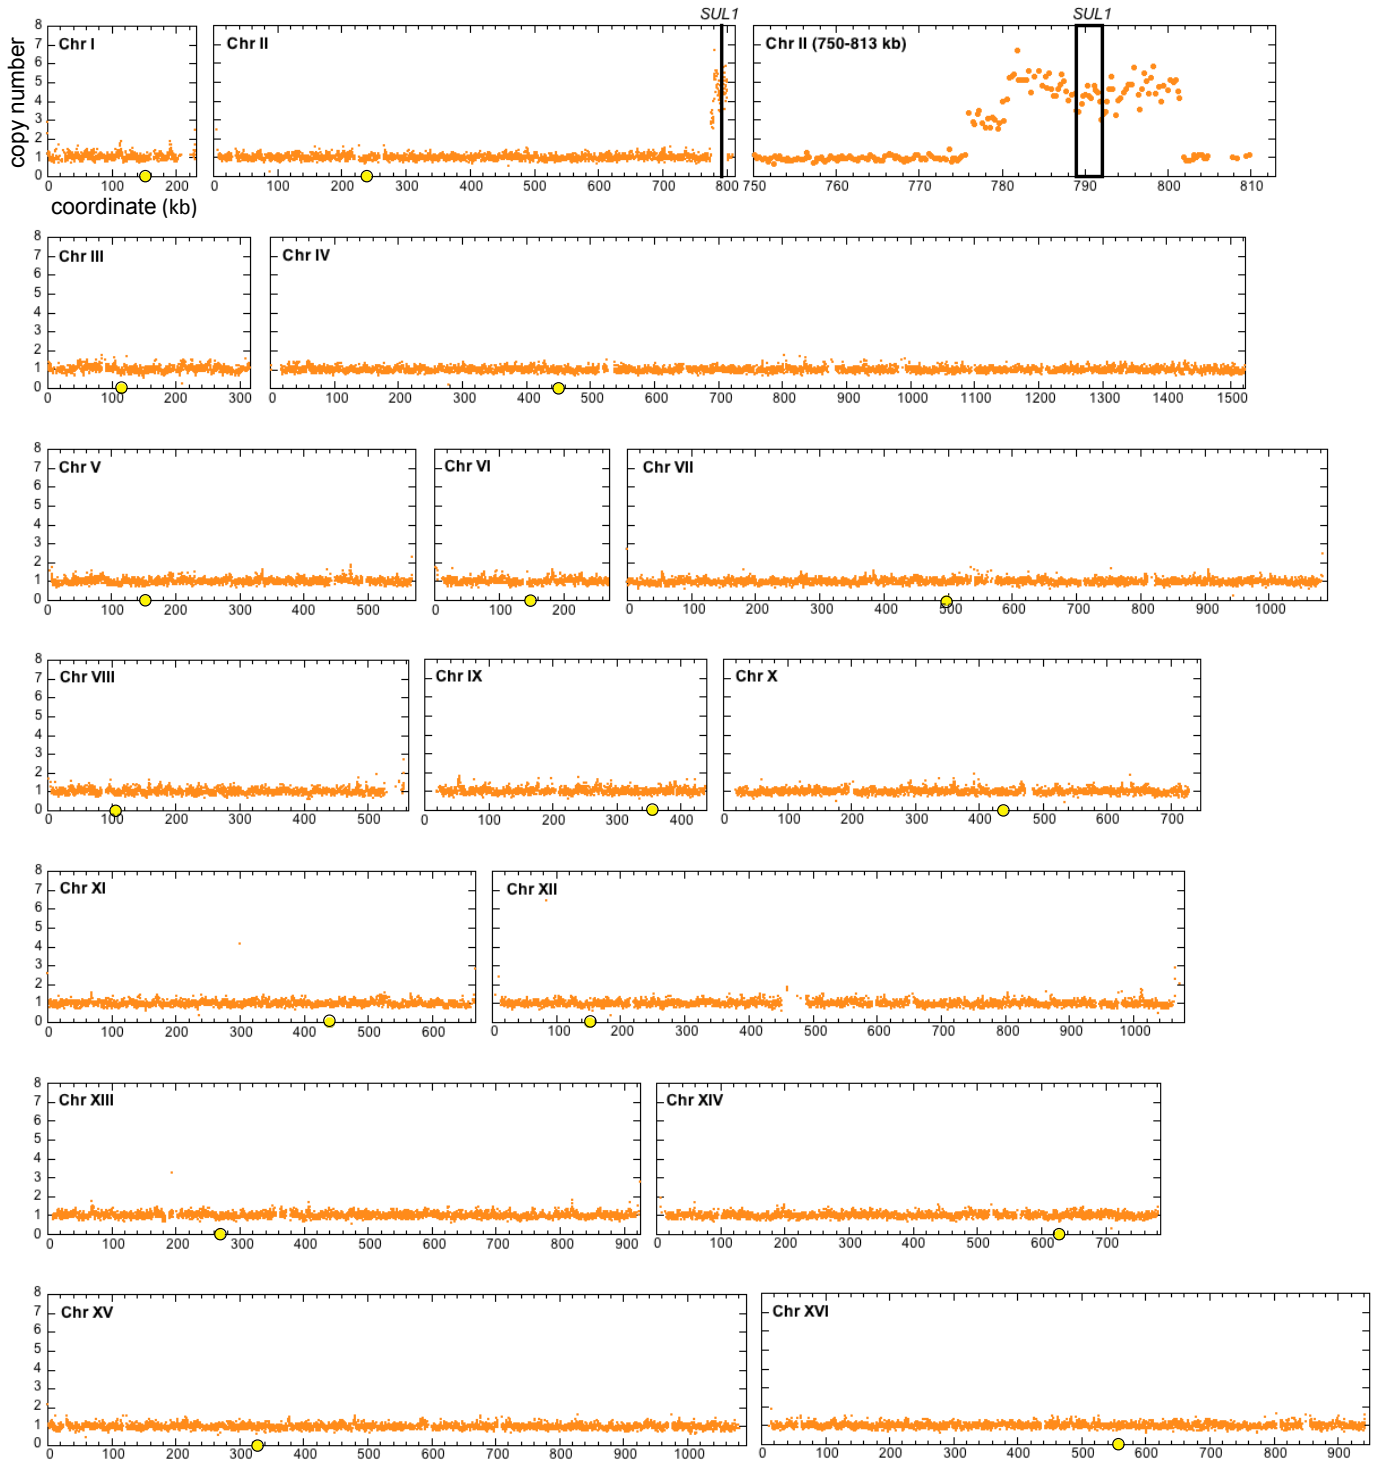

**Figure S1 Whole genome copy number data based on aCGH of evolved clones. A to F)** Copy number of each probe across the genome is shown for each chromosome in clones from populations 2 through 7. An expanded view of the last ~60 kb of chromosome II is shown to provide higher resolution for the genomic region that contains the *SUL1* locus.
