# Supplementary material
Source: PubMed Central journal article supplement (PMC3962480)
Supplement: supp_g3.113.009365_FigureS2.pdf [file supp_g3.113.009365_FigureS2.pdf]

Figure S2

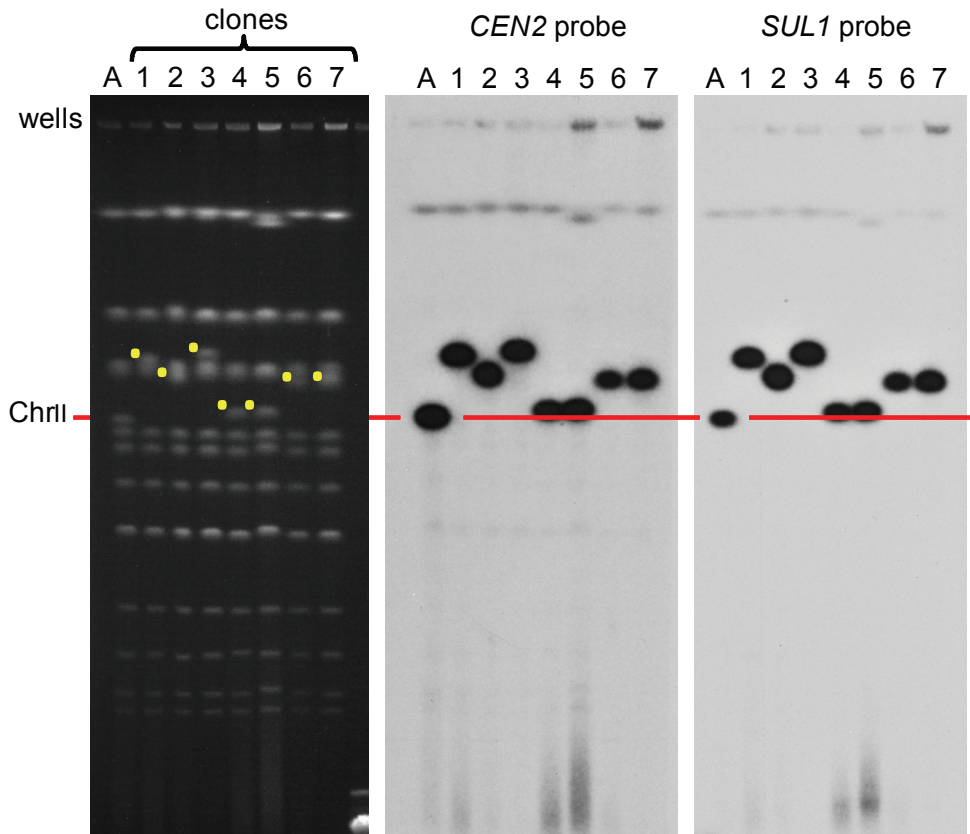

**Figure S2 CHEF gel analysis of clones from the seven populations.** LEFT: ethidium bromide stained CHEF gel of individual clones. The yellow dots to the left of specific bands indicate chromosomes unique to each evolved clone. RIGHT TWO PANELS: Autoradiograms of Southern blots hybridized with *CEN2* and *SUL1* probes show the identity of chromosome II and the location of the additional copies of *SUL1*.
