# Supplementary material
Source: PubMed Central journal article supplement (PMC3962480)
Supplement: supp_g3.113.009365_FigureS6.pdf [file supp_g3.113.009365_FigureS6.pdf]

Figure S6

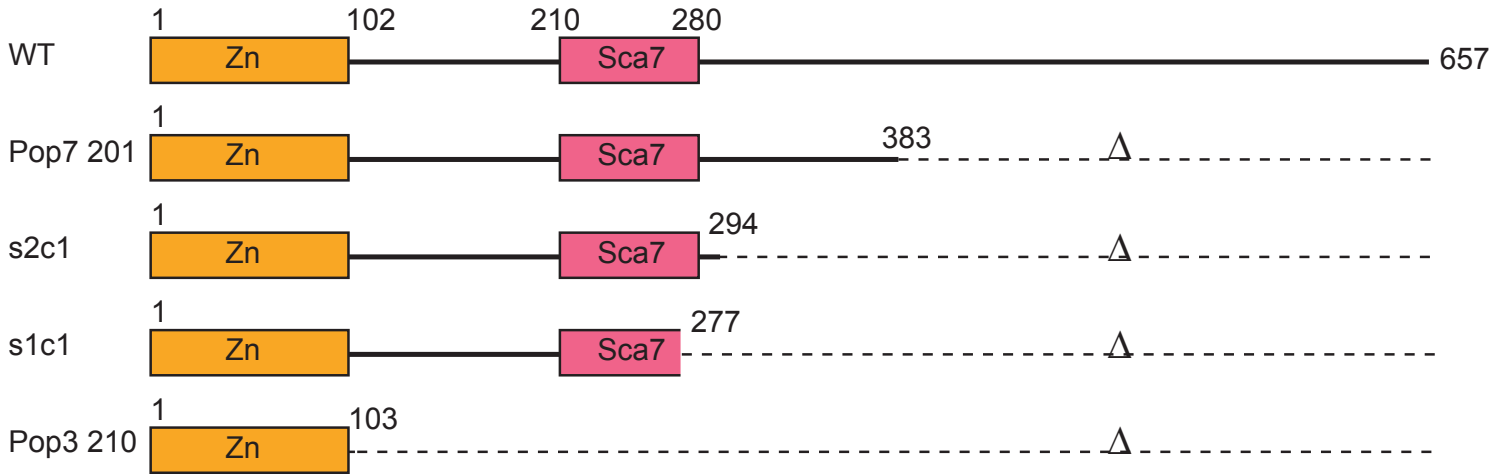

|          |                                                                                                                        |                                                                                                                                          |     |
|----------|------------------------------------------------------------------------------------------------------------------------|------------------------------------------------------------------------------------------------------------------------------------------|-----|
| WT       | 1                                                                                                                      | MRSGDAEIKG KPKV EEYSLSQSGSPSND <del>SWKSLMSSAKD</del> TPLQYDHMNRSLKKYFNPAQL EDPLDKP QYRVCEKCGKPLALTA VDHLENHCAGAS <del>GS</del> SSDPRDES | 113 |
| Pop3 210 | 1                                                                                                                      | MRSGDAEIKG KPKV EEYSLSQSGSPSND <del>SWKSLMSSAKD</del> TPLQYDHMNRSLKKYFNPAQL EDPLDKP QYRVCEKCGKPLALTA VDHLENHCAGAS <del>GS</del> SSDPRDES | 113 |
| Pop7 201 | 1                                                                                                                      | MRSGDAEIKG KPKV EEYSLSQSGSPSND <del>SWKSLMSSAKD</del> TPLQYDHMNRSLKKYFNPAQL EDPLDKP QYRVCEKCGKPLALTA VDHLENHCAGAS <del>GS</del> SSDPRDES | 113 |
| s1c1     | 1                                                                                                                      | MRSGDAEIKG KPKV EEYSLSQSGSPSND <del>SWKSLMSSAKD</del> TPLQYDHMNRSLKKYFNPAQL EDPLDKP QYRVCEKCGKPLALTA VDHLENHCAGAS <del>GS</del> SSDPRDES | 113 |
| s2c1     | 1                                                                                                                      | MRSGDAEIKG KPKV EEYSLSQSGSPSND <del>SWKSLMSSAKD</del> TPLQYDHMNRSLKKYFNPAQL EDPLDKP QYRVCEKCGKPLALTA VDHLENHCAGAS <del>GS</del> SSDPRDES | 113 |
|          |                                                                                                                        |                                                                                                                                          |     |
| 114      | TRET IRNGVESTGRNNDDDDNSNDNNDDDDDDDDDDNDDNEDDDDDDDDDDDNSNGANYKKNDSSFNPLKRSTSMESANTPNMDTKRSKTGTPQTFSSS KKQKVKQRNPTEKHL   | 226                                                                                                                                      |     |
| 114      | TRET IRNGVESTGRNNDDDDNSNDNNDDDDDDDDDDNDDNEDDDDDDDDDDDNSNGANYKKNDSSFNPLKRSTSMESANTPNMDTKRSKTGTPQTFSSS KKQKVKQRNPTEKHL   | 226                                                                                                                                      |     |
| 114      | TRET IRNGVESTGRNNDDDDNSNDNNDDDDDDDDDDNDDNEDDDDDDDDDDDNSNGANYKKNDSSFNPLKRSTSMESANTPNMDTKRSKTGTPQTFSSS KKQKVKQRNPTEKHL   | 226                                                                                                                                      |     |
| 114      | TRET IRNGVESTGRNNDDDDNSNDNNDDDDDDDDDDNDDNEDDDDDDDDDDDNSNGANYKKNDSSFNPLKRSTSMESANTPNMDTKRSKTGTPQTFSSS KKQKVKQRNPTEKHL   | 226                                                                                                                                      |     |
| 114      | TRET IRNGVESTGRNNDDDDNSNDNNDDDDDDDDDDNDDNEDDDDDDDDDDDNSNGANYKKNDSSFNPLKRSTSMESANTPNMDTKRSKTGTPQTFSSS KKQKVKQRNPTEKHL   | 226                                                                                                                                      |     |
|          |                                                                                                                        |                                                                                                                                          |     |
| 227      | DFNKQCGVELPEGGYCARSLTCKSHSMGAKRAVSGRSKPYDVLADYHREHQT GAAAEKRAKQQLQKLQKQ QKEQKKHTQQQKQGRSKQRNVNGGKSAKNGGKSTVH           | 339                                                                                                                                      |     |
| 227      | DFNKQCGVELPEGGYCARSLTCKSHSMGAKRAVSGRSKPYDVLADYHREHQT GAAAEKRAKQQLQKLQKQ QKEQKKHTQQQKQGRSKQRNVNGGKSAKNGGKSTVH           | 339                                                                                                                                      |     |
| 227      | DFNKQCGVELPEGGYCARSLTCKSHSMGAKRAVSGRSKPYDVLADYHREHQT GAAAEKRAKQQLQKLQKQ QKEQKKHTQQQKQGRSKQRNVNGGKSAKNGGKSTVH           | 339                                                                                                                                      |     |
| 227      | DFNKQCGVELPEGGYCARSLTCKSHSMGAKRAVSGRSKPYDVLADYHREHQT GAAAEKRAKQQLQKLQKQ QKEQKKHTQQQKQGRSKQRNVNGGKSAKNGGKSTVH           | 339                                                                                                                                      |     |
| 227      | DFNKQCGVELPEGGYCARSLTCKSHSMGAKRAVSGRSKPYDVLADYHREHQT GAAAEKRAKQQLQKLQKQ QKEQKKHTQQQKQGRSKQRNVNGGKSAKNGGKSTVH           | 339                                                                                                                                      |     |
|          |                                                                                                                        |                                                                                                                                          |     |
| 340      | NGNNINE GHVNLTPPEETTQVLNGVSRSPFLPLESTVLSVRYRRTKYFRMREMFASSFSVKPGYTPGYGA HSRVGCLDLDRITDYKFRVRTPOP INHLTNQNLNPKQ QR      | 452                                                                                                                                      |     |
| 340      | NGNNINE GHVNLTPPEETTQVLNGVSRSPFLPLESTVLSVRYRRTKYFRMREMFASSFSVKPGYTPGYGA HSRVGCLDLDRITDYKFRVRTPOP INHLTNQNLNPKQ QR      | 452                                                                                                                                      |     |
| 340      | NGNNINE GHVNLTPPEETTQVLNGVSRSPFLPLESTVLSVRYRRTKYFRMREMFASSFSVKPGYTPGYGA HSRVGCLDLDRITDYKFRVRTPOP INHLTNQNLNPKQ QR      | 452                                                                                                                                      |     |
| 340      | NGNNINE GHVNLTPPEETTQVLNGVSRSPFLPLESTVLSVRYRRTKYFRMREMFASSFSVKPGYTPGYGA HSRVGCLDLDRITDYKFRVRTPOP INHLTNQNLNPKQ QR      | 452                                                                                                                                      |     |
| 340      | NGNNINE GHVNLTPPEETTQVLNGVSRSPFLPLESTVLSVRYRRTKYFRMREMFASSFSVKPGYTPGYGA HSRVGCLDLDRITDYKFRVRTPOP INHLTNQNLNPKQ QR      | 452                                                                                                                                      |     |
|          |                                                                                                                        |                                                                                                                                          |     |
| 453      | LQQQRALQAQLL SQQQQQQQQQQHHSPQAQAQASTQQPTQGMVFNHFGGATNSSFANVSSKQ QQQQQQQHKSDTGLTPLE QSQQQLRQQQLQQQKFEAAASYLAN           | 565                                                                                                                                      |     |
| 453      | LQQQRALQAQLL SQQQQQQQQQQHHSPQAQAQASTQQPTQGMVFNHFGGATNSSFANVSSKQ QQQQQQQHKSDTGLTPLE QSQQQLRQQQLQQQKFEAAASYLAN           | 565                                                                                                                                      |     |
| 453      | LQQQRALQAQLL SQQQQQQQQQQHHSPQAQAQASTQQPTQGMVFNHFGGATNSSFANVSSKQ QQQQQQQHKSDTGLTPLE QSQQQLRQQQLQQQKFEAAASYLAN           | 565                                                                                                                                      |     |
| 453      | LQQQRALQAQLL SQQQQQQQQQQHHSPQAQAQASTQQPTQGMVFNHFGGATNSSFANVSSKQ QQQQQQQHKSDTGLTPLE QSQQQLRQQQLQQQKFEAAASYLAN           | 565                                                                                                                                      |     |
| 453      | LQQQRALQAQLL SQQQQQQQQQQHHSPQAQAQASTQQPTQGMVFNHFGGATNSSFANVSSKQ QQQQQQQHKSDTGLTPLE QSQQQLRQQQLQQQKFEAAASYLAN           | 565                                                                                                                                      |     |
|          |                                                                                                                        |                                                                                                                                          |     |
| 566      | ATKLMQESNQD <del>SHL</del> SGTHNNNS <del>SKNGNNL</del> MTMKAS SSPNTSVNS QSPPSVNSVNSGQGVSTG INVSGNNGR EVG GNSVNPYNGR IN | 658                                                                                                                                      |     |
| 566      | ATKLMQESNQD <del>SHL</del> SGTHNNNS <del>SKNGNNL</del> MTMKAS SSPNTSVNS QSPPSVNSVNSGQGVSTG INVSGNNGR EVG GNSVNPYNGR IN | 658                                                                                                                                      |     |
| 566      | ATKLMQESNQD <del>SHL</del> SGTHNNNS <del>SKNGNNL</del> MTMKAS SSPNTSVNS QSPPSVNSVNSGQGVSTG INVSGNNGR EVG GNSVNPYNGR IN | 658                                                                                                                                      |     |
| 566      | ATKLMQESNQD <del>SHL</del> SGTHNNNS <del>SKNGNNL</del> MTMKAS SSPNTSVNS QSPPSVNSVNSGQGVSTG INVSGNNGR EVG GNSVNPYNGR IN | 658                                                                                                                                      |     |
| 566      | ATKLMQESNQD <del>SHL</del> SGTHNNNS <del>SKNGNNL</del> MTMKAS SSPNTSVNS QSPPSVNSVNSGQGVSTG INVSGNNGR EVG GNSVNPYNGR IN | 658                                                                                                                                      |     |

**Figure S6. *SGF73* mutations identified in four independent sulfate-limited evolutions.** TOP: Diagrammatic representation of the Sgf73 protein. Boxes show protein domains. Residue numbering for the domains is shown above the protein. The extents of recovered truncations are shown by dashed lines with the last included amino acid indicated by the residue number. BOTTOM: ClustalW multiple alignment of Sgf73 sequences from a wildtype strain and four evolved strains carrying truncation mutations in *SGF73*.
